# Supplementary material
Source: Springer Nature journal article supplement (https://www.springermedizin.de/resource/supplementary/13231_2013_83_MOESM5_ESM.pdf/9676490)

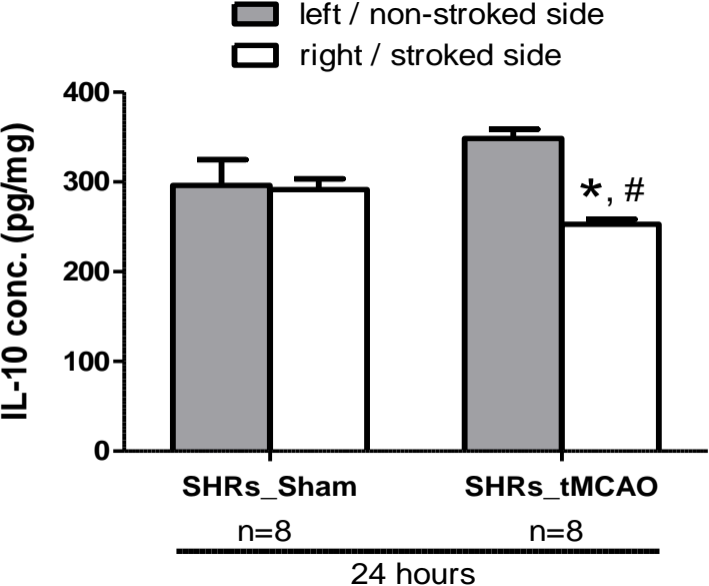

Supplement: MOESM5 [file 9676490]
